# Supplementary material for: Dynamics of Borrelia burgdorferi-Specific Antibodies: Seroconversion and Seroreversion between Two Population-Based, Cross-Sectional Surveys among Adults in Germany
Source: PubMed Central journal article supplement (PMC7761102; doi:10.3390/microorganisms8121859), 2020-11-25
Supplement: microorganisms-08-01859-s001.pdf [file microorganisms-08-01859-s001.pdf]

## Supplementary Material

This supplementary material is supporting information alongside the article “Dynamics of *Borrelia burgdorferi* specific antibodies: Seroconversion and seroreversion between two population-based, cross-sectional surveys among adults in Germany”, on behalf of the authors

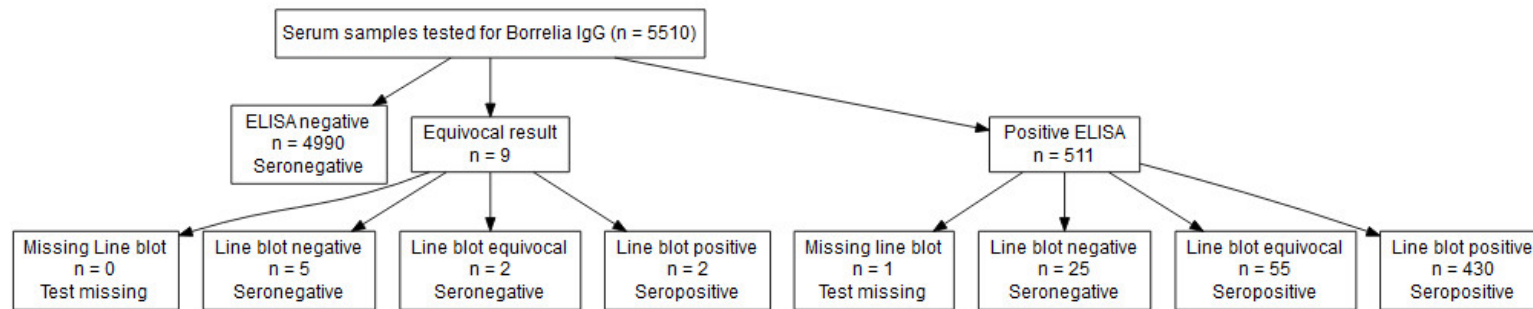

S. Figure 1. All samples of the population-based seroprevalence study in Germany, 1997-1999 were first tested with an ELISA to test for *B. burgdorferi* antibodies. In case of an equivocal or positive result, the *B. burgdorferi* antibodies were also assessed with an immunoblot.

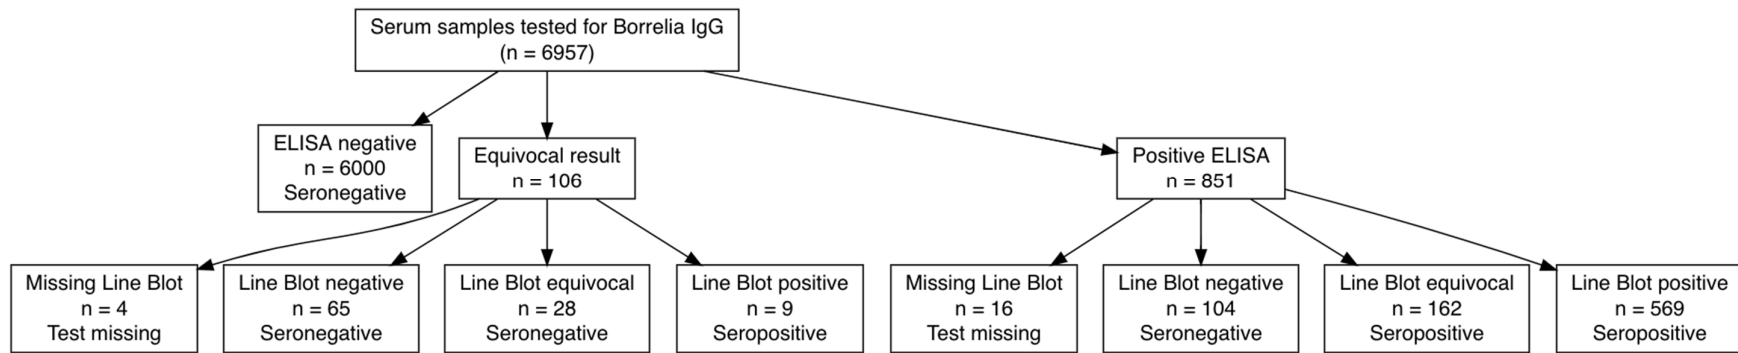

S. Figure 2. All samples of the population-based seroprevalence study in Germany, 2008-2011 were first tested with an ELISA to test for *B. burgdorferi* antibodies. In case of an equivocal or positive result, the *B. burgdorferi* antibodies were also assessed with an immunoblot.

Table 1 Estimated seroprevalence and 95% confidence intervals (CI) by several variables for two cross sectional population-based serosurveys in Germany, BGS98 in 1997-1999 (n = 5,510), and DEGS (n = 6,957) in 2008-2011.

|                               | <i>BGS98 (1997-1999)</i> |                             |             | <i>DEGS (2008-2011)</i> |                    |             |
|-------------------------------|--------------------------|-----------------------------|-------------|-------------------------|--------------------|-------------|
|                               | Unweighted N             | weighted Seroprevalence (%) | 95% CI      | Unweighted N            | Seroprevalence (%) | 95% CI      |
| <b>Sex</b>                    |                          |                             |             |                         |                    |             |
| Female                        | 2757                     | 6.27                        | 4.99-7.55   | 3671                    | 5.78               | 4.88-6.67   |
| Male                          | 2753                     | 10.75                       | 9.28-12.22  | 3406                    | 12.94              | 11.28-14.60 |
| <b>Age group</b>              |                          |                             |             |                         |                    |             |
| 18-29                         | 1047                     | 5.11                        | 3.56-6.66   | 1043                    | 6.03               | 4.35-7.72   |
| 30-39                         | 1278                     | 3.94                        | 2.78-5.11   | 827                     | 6.29               | 4.04-8.53   |
| 40-49                         | 1033                     | 5.41                        | 3.9-6.93    | 1269                    | 6.33               | 4.72-7.93   |
| 50-59                         | 1044                     | 12.00                       | 9.63-14.36  | 1374                    | 8.53               | 6.62-10.45  |
| 60-69                         | 728                      | 17.39                       | 14.22-20.56 | 1364                    | 13.17              | 10.67-15.68 |
| 70-79                         | 380                      | 16.29                       | 12.24-20.35 | 1080                    | 20                 | 16.68-23.32 |
| <b>Place of residence*</b>    |                          |                             |             |                         |                    |             |
| Baden-Württemberg             | 567                      | 13.16                       | 9.27-17.06  | 817                     | 10.56              | 8.41-12.71  |
| Bavaria                       | 650                      | 10.43                       | 7.47-13.4   | 904                     | 12.08              | 8.77-15.4   |
| Central                       | 712                      | 9.64                        | 6.53-12.74  | 886                     | 10.41              | 7.71-13.1   |
| Northwest                     | 715                      | 7.36                        | 5.14-9.57   | 928                     | 9.06               | 6.69-11.43  |
| North Rhine-Westphalia        | 870                      | 5.06                        | 3.83-6.28   | 1299                    | 5.33               | 3.68-6.97   |
| East (north)                  | 1052                     | 7.24                        | 5.78-8.69   | 1246                    | 9.34               | 6.84-11.85  |
| East (south)                  | 944                      | 9.57                        | 7.49-11.66  | 997                     | 11.88              | 8.94-14.82  |
| <b>Population</b>             |                          |                             |             |                         |                    |             |
| < 5000                        | 1262                     | 12.18                       | 10.08-14.28 | 1288                    | 15.31              | 12.7-17.92  |
| 5000-<50,000                  | 2105                     | 8.57                        | 6.97-10.16  | 3179                    | 9.59               | 8.13-11.06  |
| 50,000-500,000                | 1397                     | 8.06                        | 5.83-10.28  | 1622                    | 6.87               | 5.38-8.36   |
| >500,000                      | 746                      | 4.89                        | 3.45-6.32   | 988                     | 6.94               | 4.97-8.91   |
| <b>Social economic status</b> |                          |                             |             |                         |                    |             |
| High                          | 1178                     | 8.51                        | 6.74-10.28  | 1645                    | 9.54               | 7.76-11.32  |
| Middle                        | 3338                     | 8.70                        | 7.47-9.93   | 4115                    | 9.28               | 8.07-10.48  |
| Low                           | 865                      | 8.00                        | 5.82-10.18  | 1132                    | 9.08               | 7.00-11.17  |

\*Central comprises federal states Hessen, Rhineland-Palatinate, and Saarland; Northwest: Bremen, Hamburg, Lower Saxony, and Schleswig-Holstein; East (north): Berlin, Brandenburg, Mecklenburg-Vorpommern, and Saxony-Anhalt; East (south): Saxony, and Thuringia.
